A short report on optimization of nucleic acid probes by DNA microarray synthesis and next generation sequencing

Rachel Yuan Nong Mikkelsen and Tarjei Sigurd Mikkelsen

Department of Immunology, Genetics and Pathology and SciLifeLab, Uppsala University, Uppsala Sweden

Broad Institute of Harvard and MIT, Cambridge, Boston, USA

Correspondence: [rachel.nong@gmail.com](mailto:rachel.nong@gmail.com), [tarjei.mikkelsen@gmail.com](mailto:tarjei.mikkelsen@gmail.com)

This manuscript has been withdrawn by bioRxiv as it was submitted and made public without the full consent of all the authors. Therefore, the authors do not wish this work to be cited as reference for the project. If you have any questions, please contact the corresponding author
